# Supplementary material for: Effective Dipole Moment Model for Axially Symmetric C3v Molecules: Application to the Precise Study of Absolute Line Strengths of the ν6 Fundamental of CH335Cl
Source: MDPI journal article supplement (doi:10.3390/ijms241512122), 2023-07-28
Supplement: s1 [file s1]

## Supplementary material 2

Ro-vibrational term values for the  $\nu_6$  vibrational state of the  $\text{CH}_3^{35}\text{Cl}$  molecule (in  $\text{cm}^{-1}$ )

Electronic supplementary materials to:

Effective dipole moment model for axially symmetric  $C_{3v}$  molecules: Application to the precise study of absolute line strengths of the  $\nu_6$  fundamental of  $\text{CH}_3\text{Cl}$

O. N. Ulenikov<sup>†,a</sup>, E. S. Bekhtereva<sup>a</sup>, O. V. Gromova<sup>a</sup>, A. L. Fomchenko<sup>a</sup>,

Yu. B. Morzhikova<sup>a</sup>, S. S. Sidko<sup>a</sup>, C. Sydow<sup>b</sup>, and S. Bauerecker<sup>§,b</sup>

<sup>a</sup> Research School of High-Energy Physics, National Research Tomsk Polytechnic University, Tomsk 634050, Russia;

<sup>b</sup> Institut für Physikalische und Theoretische Chemie, Technische Universität Braunschweig, D - 38106, Braunschweig, Germany.

Ro-vibrational term values for the  $v_6$  vibrational state of the  $\text{CH}_3^{35}\text{Cl}$  molecule (in  $\text{cm}^{-1}$ )<sup>a</sup>.

| $J$ | $K$ | $\Gamma$       | $E^{\text{exp}}$ | $\Delta$ | $\delta$ | $J$ | $K$            | $\Gamma$       | $E^{\text{exp}}$ | $\Delta$ | $\delta$ | $J$ | $K$            | $\Gamma$       | $E^{\text{exp}}$ | $\Delta$ | $\delta$ | $J$  | $K$            | $\Gamma$       | $E^{\text{exp}}$ | $\Delta$ | $\delta$ | $J$ | $K$            | $\Gamma$       | $E^{\text{exp}}$ | $\Delta$ | $\delta$ |   |   |
|-----|-----|----------------|------------------|----------|----------|-----|----------------|----------------|------------------|----------|----------|-----|----------------|----------------|------------------|----------|----------|------|----------------|----------------|------------------|----------|----------|-----|----------------|----------------|------------------|----------|----------|---|---|
| 1   | 2   | 3              | 4                | 1        | 2        | 3   | 4              | 1              | 2                | 3        | 4        | 1   | 2              | 3              | 4                | 1        | 2        | 3    | 4              | 1              | 2                | 3        | 4        | 1   | 2              | 3              | 4                | 1        | 2        | 3 | 4 |
| 1   | 0   | E              | 1018.95434       | 2        | 0        | 9   | 2              | A <sub>1</sub> | 1082.21378       | 3        | 0        | 13  | 0              | E              | 1098.45251       | 2        | 1        | 15   | 14             | A <sub>1</sub> | 2095.41934       | 4        | -15      | 18  | 7              | E              | 1421.68934       | 6        | -1       |   |   |
| 1   | 1   | A <sub>1</sub> | 1021.12358       | 1        | 4        | 9   | 2              | A <sub>2</sub> | 1082.21378       | 3        | -1       | 13  | 1              | A <sub>1</sub> | 1100.66713       | -        | 2        | 15   | 14             | A <sub>2</sub> | 2095.41934       | 4        | -15      | 18  | 8              | E              | 1454.21676       | 3        | 2        |   |   |
| 1   | 1   | A <sub>2</sub> | 1021.12259       | 1        | 2        | 9   | 3              | E              | 1093.05960       | 8        | 2        | 13  | 1              | A <sub>2</sub> | 1100.57882       | -        | 2        | 15   | 15             | E              | 2158.01168       | -        | -4       | 18  | 8              | A <sub>1</sub> | 1495.93961       | 9        | 3        |   |   |
| 1   | 1   | E              | 1026.36326       | -1       | 3        | 9   | 3              | E              | 1108.76654       | 2        | -3       | 13  | 1              | E              | 1105.85747       | 6        | -2       | 15   | 15             | E              | 2235.75834       | -        | -14      | 18  | 8              | A <sub>2</sub> | 1495.93961       | 9        | 2        |   |   |
| 2   | 0   | E              | 1020.72141       | 1        | 3        | 9   | 4              | A <sub>1</sub> | 1123.94824       | 3        | 4        | 13  | 2              | E              | 1112.36828       | 4        | -2       | 16   | 0              | E              | 1138.18676       | 3        | -2       | 18  | 9              | E              | 1532.78806       | 11       | 1        |   |   |
| 2   | 1   | A <sub>1</sub> | 1022.88870       | 1        | 2        | 9   | 4              | A <sub>2</sub> | 1123.94824       | 3        | 4        | 13  | 2              | A <sub>1</sub> | 1122.83593       | 4        | -2       | 16   | 1              | A <sub>1</sub> | 1140.29224       | 1        | 1        | 18  | 9              | E              | 1579.69200       | 8        | 5        |   |   |
| 2   | 1   | A <sub>2</sub> | 1022.89165       | 1        | 5        | 9   | 4              | E              | 1144.88457       | 8        | 4        | 13  | 2              | A <sub>2</sub> | 1122.83593       | 4        | -2       | 16   | 1              | A <sub>2</sub> | 1140.42415       | -        | -2       | 18  | 10             | A <sub>1</sub> | 1620.85546       | 4        | 0        |   |   |
| 2   | 1   | E              | 1028.13024       | 0        | 0        | 9   | 5              | E              | 1164.39958       | 4        | 2        | 13  | 3              | E              | 1133.68594       | 2        | 3        | 16   | 1              | E              | 1145.58982       | 1        | -2       | 18  | 10             | A <sub>2</sub> | 1620.85546       | 4        | 0        |   |   |
| 2   | 2   | E              | 1034.63621       | 2        | 4        | 9   | 5              | A <sub>1</sub> | 1190.55987       | 3        | -2       | 13  | 3              | E              | 1149.38416       | 5        | -2       | 16   | 2              | E              | 1152.10329       | 0        | 0        | 18  | 10             | E              | 1672.92848       | 7        | 4        |   |   |
| 2   | 2   | A <sub>1</sub> | 1045.11498       | -4       | 9        | 9   | 5              | A <sub>2</sub> | 1190.55987       | 3        | -2       | 13  | 4              | A <sub>1</sub> | 1164.57161       | 1        | 2        | 16   | 2              | A <sub>1</sub> | 1162.56511       | 5        | 2        | 18  | 11             | E              | 1718.40020       | 3        | -1       |   |   |
| 2   | 2   | A <sub>2</sub> | 1045.11498       | -4       | 9        | 9   | 6              | E              | 1214.40510       | 6        | 2        | 13  | 4              | A <sub>2</sub> | 1164.57161       | 1        | 2        | 16   | 2              | A <sub>2</sub> | 1162.56511       | 5        | 0        | 18  | 11             | A <sub>1</sub> | 1775.62904       | 3        | 0        |   |   |
| 3   | 0   | E              | 1023.37195       | 4        | 2        | 9   | 6              | E              | 1245.78276       | 13       | 7        | 13  | 4              | E              | 1185.49635       | 4        | -2       | 16   | 3              | E              | 1173.41919       | 1        | 1        | 18  | 11             | A <sub>2</sub> | 1775.62904       | 3        | 0        |   |   |
| 3   | 1   | A <sub>1</sub> | 1025.54370       | 4        | 7        | 9   | 7              | A <sub>1</sub> | 1273.95415       | 5        | -2       | 13  | 5              | E              | 1205.01881       | 4        | 2        | 16   | 3              | E              | 1189.10891       | 8        | 3        | 18  | 12             | E              | 1825.40152       | 0        | 0        |   |   |
| 3   | 1   | A <sub>2</sub> | 1025.53785       | 1        | 2        | 9   | 7              | A <sub>2</sub> | 1273.95415       | 5        | -2       | 13  | 5              | A <sub>1</sub> | 1231.16463       | 7        | -2       | 16   | 4              | A <sub>1</sub> | 1204.30195       | 5        | -3       | 18  | 12             | E              | 1887.77169       | 4        | -4       |   |   |
| 3   | 1   | E              | 1030.78066       | 1        | 0        | 9   | 7              | E              | 1310.54103       | 3        | 1        | 13  | 5              | A <sub>2</sub> | 1231.16463       | 7        | -2       | 16   | 4              | A <sub>2</sub> | 1204.30195       | 5        | -3       | 18  | 13             | E              | 1941.83656       | 11       | -3       |   |   |
| 3   | 2   | E              | 1037.28680       | 2        | 6        | 9   | 8              | E              | 1343.03411       | 0        | -1       | 13  | 6              | E              | 1255.01892       | 5        | 0        | 16   | 4              | E              | 1225.21537       | 3        | -2       | 18  | 13             | A <sub>2</sub> | 1941.83656       | 11       | -3       |   |   |
| 3   | 2   | A <sub>1</sub> | 1047.76518       | 2        | -3       | 9   | 8              | A <sub>1</sub> | 1384.82095       | 5        | 6        | 13  | 6              | E              | 1286.37912       | 3        | -1       | 16   | 5              | E              | 1244.74512       | 9        | 3        | 18  | 13             | E              | 2009.33243       | 12       | -10      |   |   |
| 3   | 2   | A <sub>2</sub> | 1047.76518       | 2        | -3       | 9   | 8              | A <sub>2</sub> | 1384.82095       | 5        | 6        | 13  | 7              | A <sub>1</sub> | 1314.56135       | 5        | -3       | 16   | 5              | A <sub>1</sub> | 1270.87673       | 5        | -4       | 18  | 14             | E              | 2067.68065       | 2        |          |   |   |
| 3   | 3   | E              | 1058.60755       | 3        | 2        | 9   | 9              | E              | 1421.63023       | 6        | -1       | 13  | 7              | A <sub>2</sub> | 1314.56135       | 5        | -3       | 16   | 5              | A <sub>2</sub> | 1270.87673       | 5        | -4       | 18  | 14             | A <sub>1</sub> | 2140.28540       | 6        | -5       |   |   |
| 3   | 3   | E              | 1074.32179       | -7       | 9        | 9   | 9              | E              | 1468.60642       | 7        | 7        | 13  | 7              | E              | 1351.12788       | 4        | 0        | 16   | 6              | E              | 1294.73995       | 3        | 0        | 18  | 14             | E              | 2140.28540       | 6        | -5       |   |   |
| 4   | 0   | E              | 1026.90593       | 4        | 1        | 10  | 0              | E              | 1066.65799       | 1        | 2        | 13  | 8              | E              | 1383.63347       | 3        | -2       | 16   | 6              | E              | 1326.08310       | 8        | -2       | 18  | 15             | E              | 2202.90684       | 5        | -1       |   |   |
| 4   | 1   | A <sub>1</sub> | 1029.06997       | 1        | 2        | 10  | 1              | A <sub>1</sub> | 1068.80103       | 0        | 3        | 13  | 8              | A <sub>1</sub> | 1425.39701       | 8        | 7        | 16   | 7              | A <sub>1</sub> | 1354.27592       | 4        | -1       | 18  | 15             | E              | 2280.60255       | 26       | -2       |   |   |
| 4   | 1   | A <sub>2</sub> | 1029.07969       | 3        | 1        | 10  | 1              | A <sub>2</sub> | 1068.85442       | 2        | 2        | 13  | 8              | A <sub>2</sub> | 1425.39701       | 8        | 7        | 16   | 7              | A <sub>2</sub> | 1354.27592       | 4        | -1       | 18  | 16             | A <sub>1</sub> | 2347.48647       | 0        |          |   |   |
| 4   | 1   | E              | 1034.31447       | 3        | 0        | 10  | 1              | E              | 1074.06450       | 3        | -2       | 13  | 9              | E              | 1462.22054       | 6        | -1       | 16   | 7              | E              | 1390.82251       | 8        | -1       | 18  | 16             | A <sub>2</sub> | 2347.48647       | 0        |          |   |   |
| 4   | 2   | E              | 1040.82081       | 3        | 4        | 10  | 2              | E              | 1080.57334       | 1        | 5        | 13  | 9              | E              | 1509.17034       | 6        | 3        | 16   | 8              | E              | 1423.34039       | 5        | 1        | 18  | 16             | E              | 2430.25425       | 26       |          |   |   |
| 4   | 2   | A <sub>1</sub> | 1051.29871       | 1        | -3       | 10  | 2              | A <sub>1</sub> | 1091.04554       | 4        | -3       | 13  | 10             | A <sub>1</sub> | 1550.30584       | 10       | 3        | 16   | 8              | A <sub>1</sub> | 1465.08104       | 7        | 5        | 18  | 17             | E              | 2501.38865       | -9       |          |   |   |
| 4   | 2   | A <sub>2</sub> | 1051.29871       | 1        | -3       | 10  | 2              | A <sub>2</sub> | 1091.04554       | 4        | -3       | 13  | 10             | A <sub>2</sub> | 1550.30584       | 10       | 3        | 16   | 8              | A <sub>2</sub> | 1465.08104       | 7        | 5        | 18  | 18             | E              | 2664.58105       | -        | 8        |   |   |
| 4   | 3   | E              | 1062.14146       | 2        | 5        | 10  | 3              | E              | 1101.89229       | 1        | 3        | 13  | 10             | E              | 1602.43000       | 1        | 1        | 16   | 9              | E              | 1501.91857       | 5        | 0        | 19  | 0              | E              | 1185.85487       | 4        | -1       |   |   |
| 4   | 3   | E              | 1077.85496       | 2        | -3       | 10  | 3              | E              | 1117.59733       | 3        | -3       | 13  | 11             | E              | 1647.87051       | 1        | 1        | 16   | 9              | E              | 1548.84253       | 4        | 0        | 19  | 1              | A <sub>1</sub> | 1188.11976       | 9        |          |   |   |
| 4   | 4   | A <sub>1</sub> | 1093.03230       | 2        | 5        | 10  | 4              | A <sub>1</sub> | 1132.78027       | 1        | 3        | 13  | 11             | A <sub>1</sub> | 1705.15596       | 2        | -3       | 16   | 10             | A <sub>1</sub> | 1589.99380       | 2        | 1        | 19  | 1              | A <sub>2</sub> | 1187.93545       | 3        | 1        |   |   |
| 4   | 4   | A <sub>2</sub> | 1093.03230       | 2        | 5        | 10  | 4              | A <sub>2</sub> | 1132.78027       | 1        | 3        | 13  | 11             | A <sub>2</sub> | 1705.15596       | 2        | -3       | 16   | 10             | A <sub>2</sub> | 1589.99380       | 2        | 1        | 19  | 1              | E              | 1193.25565       | 4        | -2       |   |   |
| 4   | 4   | E              | 1113.97733       | -6       | 10       | 10  | 4              | E              | 1153.71410       | 8        | 2        | 13  | 12             | E              | 1754.89392       | 10       | 9        | 16   | 10             | E              | 1642.08917       | 2        | -1       | 19  | 2              | E              | 1199.77242       | 5        | -1       |   |   |
| 5   | 0   | E              | 1031.32331       | 1        | 0        | 10  | 5              | E              | 1173.23072       | 5        | 3        | 13  | 12             | E              | 1817.32620       | -8       | 16       | 11   | E              | 1687.54731     | 6                | 4        | 19       | 2   | A <sub>1</sub> | 1210.22706     | 6                | -6       |          |   |   |
| 5   | 1   | A <sub>1</sub> | 1033.49958       | 2        | 1        | 10  | 5              | A <sub>1</sub> | 1199.38786       | 5        | -3       | 13  | 13             | A <sub>1</sub> | 1871.35298       | 2        | -1       | 16   | 11             | A <sub>1</sub> | 1744.80089       | 2        | 1        | 19  | 2              | A <sub>2</sub> | 1210.22706       | 6        | -2       |   |   |
| 5   | 1   | A <sub>2</sub> | 1033.48501       | 1        | 1        | 10  | 5              | A <sub>2</sub> | 1199.38786       | 5        | -3       | 13  | 13             | A <sub>2</sub> | 1871.35298       | 2        | -1       | 16   | 11             | A <sub>2</sub> | 1744.80089       | 2        | 1        | 19  | 3              | E              | 1221.08620       | 2        | 0        |   |   |
| 5   | 1   | E              | 1038.73164       | 2        | 1        | 10  | 6              | E              | 1223.23504       | 3        | -1       | 13  | 13             | E              | 1938.91668       | -        | -22      | 16   | 12             | E              | 1794.55820       | 6        | -1       | 19  | 3              | E              | 1236.76554       | 3        | -2       |   |   |
| 5   | 2   | E              | 1045.23823       | 3        | 3        | 10  | 6              | E              | 1254.60888       | 1        | 0        | 14  | 0              | E              | 110.81531        | 2        | -2       | 16   | 12             | E              | 1856.95560       | 3        | -5       | 19  | 4              | A <sub>1</sub> | 1251.96553       | 2        | 0        |   |   |
| 5   | 2   | A <sub>1</sub> | 1055.71552       | 2        | -2       | 10  | 7              | A <sub>1</sub> | 1282.78268       | 5        | -1       | 14  | 1              | A <sub>1</sub> | 1112.93515       | 1        | 1        | 16   | 13             | A <sub>1</sub> | 1911.00378       | -        | -3       | 19  | 4              | A <sub>2</sub> | 1251.96553       | 2        | 0        |   |   |
| 5   | 2   | A <sub>2</sub> | 1055.71552       | 2        | -2       | 10  | 7              | A <sub>2</sub> | 1282.78268       | 5        | -1       | 14  | 1              | A <sub>2</sub> | 1113.03704       | 1        | 1        | 16   | 13             | A <sub>2</sub> | 1911.00378       | -        | -3       | 19  | 4              | E              | 1272.86524       | 5        | -2       |   |   |
| 5   | 3   | E              | 1066.55864       | 8        | -1       | 10  | 7              | E              | 1319.36514       | 4        | 2        | 14  | 1              | E              | 1118.21970       | 4        | -2       | 16   | 13             | E              | 1978.52948       | 10       | -1       | 19  | 5              | E              | 1292.40373       | 3        | -2       |   |   |
| 5   | 3   | E              | 1082.27127       | 4        | -2       | 10  | 8              | E              | 1351.86095       | 1        | 0        | 14  | 2              | E              | 1124.73133       | 5        | -1       | 16   | 14             | E              | 2036.85928       | 2        | 0        | 19  | 5              | A <sub>1</sub> | 1318.51837       | 10       | 1        |   |   |
| 5   | 4   | A <sub>1</sub> | 1097.44922       | 2        | 4        | 10  | 8              | A <sub>1</sub> | 1393.64269       | 3        | 5        | 14  | 2              | A <sub>1</sub> | 1135.19715       | 6        | -3       | 16   | 14             | A <sub>1</sub> | 2109.49638       | -        | -6       | 19  | 5              | A <sub>2</sub> | 1318.51837       | 10       | 1        |   |   |
| 5   | 4   | A <sub>2</sub> | 1097.44922       | 2        | 4        | 10  | 8              | A <sub>2</sub> | 1393.64269       | 3        | 5        | 14  | 2              | A <sub>2</sub> | 1135.19715       | 6        | -5       | 16   | 14             | A <sub>2</sub> | 2109.49638       | -        | -6       | 19  | 6              | A <sub>1</sub> | 1342.39227       | 4        | 0        |   |   |
| 5   | 4   | E              | 1118.39302       | 3        | -5       | 10  | 9              | E              | 1430.45509       | 5        | 0        | 14  | 3              | E              | 1146.04842       | 0        | 16       | 15   | E              | 2172.09782     | 1                | 0        | 19       | 6   | E              | 1373.71496     | 5                | -1       |          |   |   |
| 5   | 5   | E              | 1137.90328       | 1        | 3        | 10  | 9              | E              | 1477.42551       | 7        | 4        | 14  | 3              | E              | 1161.74399       | 1        | -4       | 16   | 15             | E              | 2249.82850       | -        | -6       | 19  | 7              | A <sub>1</sub> | 1401.92047       | 4        | -1       |   |   |
| 5   | 5   | A <sub>1</sub> | 1164.07304       | 3        | 10       | 10  | A <sub>1</sub> | 1518.54838     | 5                | 0        | 14       | 4   | A <sub>1</sub> | 1176.93323     | 1                | 3        | 16       | 16   | A <sub>1</sub> | 2316.69058     | 7                | -6       | 19       | 7   | A <sub>2</sub> | 1401.92047     | 4                | -1       |          |   |   |
| 5   | 5   | A <sub>2</sub> | 1164.07304       | 3        | 10       | 10  | A <sub>2</sub> | 1518.54838     | 5                | 0        | 14       | 4   | A <sub>2</sub> | 1176.93323     | 1                | 3        | 16       | 16</ |                |                |                  |          |          |     |                |                |                  |          |          |   |   |

Continued

| $J$ | $K$ | $\Gamma$ | $E^{\text{exp}}$ | $\Delta$ | $\delta$ | $J$ | $K$ | $\Gamma$ | $E^{\text{exp}}$ | $\Delta$ | $\delta$ | $J$ | $K$ | $\Gamma$ | $E^{\text{exp}}$ | $\Delta$ | $\delta$ | $J$ | $K$ | $\Gamma$ | $E^{\text{exp}}$ | $\Delta$ | $\delta$ | $J$ | $K$   | $\Gamma$   | $E^{\text{exp}}$ | $\Delta$ | $\delta$ |   |   |
|-----|-----|----------|------------------|----------|----------|-----|-----|----------|------------------|----------|----------|-----|-----|----------|------------------|----------|----------|-----|-----|----------|------------------|----------|----------|-----|-------|------------|------------------|----------|----------|---|---|
| 1   | 2   | 3        | 4                | 1        | 2        | 3   | 4   | 1        | 2                | 3        | 4        | 1   | 2   | 3        | 4                | 1        | 2        | 3   | 4   | 1        | 2                | 3        | 4        | 1   | 2     | 3          | 4                | 1        | 2        | 3 | 4 |
| 20  | 14  | $A_2$    | 2174.58628       | 4        | 4        | 23  | 2   | $A_2$    | 1286.10404       | 8        | 3        | 25  | 9   | $E$      | 1715.35891       | -4       |          | 27  | 16  | $A_1$    | 2529.50106       | 29       | -7       | 30  | 6     | $E$        | 1584.84736       | 2        | 0        |   |   |
| 20  | 15  | $E$      | 2237.22991       | 4        | -5       | 23  | 3   | $E$      | 1296.97130       | 1        | 1        | 25  | 10  | $A_1$    | 1756.57648       | -1       |          | 27  | 16  | $A_2$    | 2529.50106       | 29       | -7       | 30  | 6     | $E$        | 1616.06539       | 11       | -1       |   |   |
| 20  | 16  | $A_1$    | 2381.79480       | 12       | -7       | 23  | 3   | $E$      | 1312.63400       | 4        | -2       | 25  | 10  | $A_2$    | 1756.57648       | -1       |          | 27  | 17  | $E$      | 2683.32022       | 0        |          | 30  | 7     | $A_1$      | 1644.33606       | 5        | 5        |   |   |
| 20  | 16  | $A_2$    | 2381.79480       | 12       | -7       | 23  | 4   | $A_1$    | 1327.84510       | 10       | 4        | 25  | 10  | $E$      | 1808.55085       | 1        | 3        | 27  | 18  | $E$      | 2846.42408       | -6       |          | 30  | 7     | $A_2$      | 1644.33606       | 5        | 5        |   |   |
| 20  | 16  | $E$      | 2464.52036       |          | 13       | 23  | 4   | $A_2$    | 1327.84510       | 10       | 4        | 25  | 11  | $E$      | 1854.08283       | 15       | -5       | 27  | 19  | $A_1$    | 3018.77838       | 12       |          | 30  | 7     | $E$        | 1680.73653       | 12       | 2        |   |   |
| 20  | 17  | $E$      | 2535.68148       | 7        | 1        | 23  | 4   | $E$      | 1348.72291       | 0        | 0        | 25  | 11  | $A_1$    | 1911.20259       | 3        | 3        | 27  | 19  | $A_2$    | 3018.77838       | 12       |          | 30  | 8     | $E$        | 1713.34440       | 7        | -1       |   |   |
| 20  | 18  | $E$      | 2698.85705       |          | 1        | 23  | 5   | $E$      | 1368.27546       | 2        | 0        | 25  | 11  | $A_2$    | 1911.20259       | 3        | 3        | 28  | 0   | $E$      | 1376.38503       | 7        | -1       | 30  | 8     | $A_1$      | 1754.91774       | 13       | 4        |   |   |
| 20  | 19  | $A_1$    | 2871.28711       |          | 14       | 23  | 5   | $A_1$    | 1394.36282       | 7        | -3       | 25  | 12  | $E$      | 1961.04185       | 4        | 1        | 28  | 1   | $A_1$    | 1378.36729       | 4        | -3       | 30  | 8     | $A_2$      | 1754.91774       | 13       | 4        |   |   |
| 20  | 19  | $A_2$    | 2871.28711       |          | 14       | 23  | 5   | $A_2$    | 1394.36282       | 7        | -3       | 25  | 12  | $E$      | 2023.29218       | 4        | 3        | 28  | 1   | $A_2$    | 1378.76007       | 4        | -5       | 30  | 9     | $E$        | 1791.85788       | 5        | -2       |   |   |
| 21  | 0   | $E$      | 1222.03784       | 4        | 1        | 23  | 6   | $E$      | 1418.25387       | 3        | -2       | 25  | 13  | $A_1$    | 2077.43061       | 4        | 1        | 28  | 1   | $E$      | 1383.77718       | 10       | -8       | 30  | 9     | $E$        | 1838.59292       | 9        | -6       |   |   |
| 21  | 1   | $A_1$    | 1224.32346       |          | -1       | 23  | 6   | $E$      | 1449.54402       | 4        | 8        | 25  | 13  | $A_2$    | 2077.43061       | 4        | 1        | 28  | 2   | $E$      | 1390.30869       | 4        | -1       | 30  | 10    | $A_1$      | 1879.85976       | 3        | -2       |   |   |
| 21  | 1   | $A_2$    | 1224.09955       | 4        | -1       | 23  | 7   | $A_1$    | 1477.76970       | 5        | -3       | 25  | 13  | $E$      | 2144.79555       | 18       | -2       | 28  | 2   | $A_1$    | 1400.73351       | 3        | -5       | 30  | 10    | $A_2$      | 1879.85976       | 3        | -2       |   |   |
| 21  | 1   | $E$      | 1229.43691       | 4        | -2       | 23  | 7   | $A_2$    | 1477.76970       | 5        | -3       | 25  | 14  | $E$      | 2203.22438       | 1        | -1       | 28  | 2   | $A_2$    | 1400.73351       | 3        | 0        | 30  | 10    | $E$        | 1931.74436       | 4        | 3        |   |   |
| 21  | 2   | $E$      | 1235.95628       | 6        | -2       | 23  | 7   | $E$      | 1514.25429       | 9        | 4        | 25  | 14  | $A_1$    | 2275.68677       | -4       |          | 28  | 3   | $E$      | 1411.61350       | 1        | -3       | 30  | 11    | $E$        | 1977.33135       | 4        | 1        |   |   |
| 21  | 2   | $A_1$    | 1246.40544       | 4        | -4       | 23  | 8   | $E$      | 1546.81034       | 3        | 3        | 25  | 14  | $A_2$    | 2275.68677       | -4       |          | 28  | 3   | $E$      | 1427.25081       | 11       | 1        | 30  | 11    | $A_1$      | 2034.35174       | 2        | 5        |   |   |
| 21  | 2   | $A_2$    | 1246.40544       | 4        | 0        | 23  | 8   | $A_1$    | 1588.47986       | 4        | 5        | 25  | 15  | $E$      | 2338.39637       | 11       | -7       | 28  | 4   | $A_1$    | 1442.47879       | 3        | -3       | 30  | 11    | $A_2$      | 2034.35174       | 2        | 5        |   |   |
| 21  | 3   | $E$      | 1257.26842       | 2        | -1       | 23  | 8   | $A_2$    | 1588.47986       | 4        | 5        | 25  | 15  | $E$      | 2415.93790       | -1       |          | 28  | 4   | $A_2$    | 1442.47879       | 3        | -3       | 30  | 12    | $E$        | 2084.25185       | 2        | 1        |   |   |
| 21  | 3   | $E$      | 1272.93988       | 6        | 0        | 23  | 9   | $E$      | 1625.36099       | 3        | 3        | 25  | 16  | $A_1$    | 2482.91796       | 10       | -5       | 28  | 4   | $E$      | 1463.32336       | 4        | -1       | 30  | 12    | $E$        | 2146.39313       | 4        | 9        |   |   |
| 21  | 4   | $A_1$    | 1288.14508       | 1        | -3       | 23  | 9   | $E$      | 1672.20465       | 6        | 2        | 25  | 16  | $A_2$    | 2482.91796       | 10       | -5       | 28  | 5   | $E$      | 1482.89736       | 4        | -2       | 30  | 13    | $A_1$      | 2200.59855       | 1        | 1        |   |   |
| 21  | 4   | $A_2$    | 1288.14508       | 1        | -3       | 23  | 10  | $A_1$    | 1713.40493       | 3        | -3       | 25  | 17  | $E$      | 2636.75842       | 9        | 3        | 28  | 5   | $A_1$    | 1508.94344       | 6        | 1        | 30  | 13    | $A_2$      | 2200.59855       | 1        | 1        |   |   |
| 21  | 4   | $E$      | 1309.03445       | 5        | 2        | 23  | 10  | $A_2$    | 1713.40493       | 3        | -3       | 25  | 18  | $E$      | 2799.88490       | 0        |          | 28  | 5   | $A_2$    | 1508.94344       | 6        | 1        | 30  | 13    | $E$        | 2267.84443       | 2        | 11       |   |   |
| 21  | 5   | $E$      | 1328.57959       | 3        | -2       | 23  | 10  | $E$      | 1765.41069       | 0        |          | 25  | 19  | $A_1$    | 2972.26308       | 14       |          | 28  | 6   | $E$      | 1532.86054       | 2        | -1       | 30  | 14    | $E$        | 2326.34670       | 1        |          |   |   |
| 21  | 5   | $A_1$    | 1354.68127       | 7        | 2        | 23  | 11  | $E$      | 1810.92356       | 2        | 1        | 25  | 19  | $A_2$    | 2972.26308       | 14       |          | 28  | 6   | $E$      | 1564.10101       | 6        | -9       | 30  | 15    | $E$        | 2461.46954       | 6        | -1       |   |   |
| 21  | 5   | $A_2$    | 1354.68127       | 7        | 2        | 23  | 11  | $A_1$    | 1868.07796       | 6        | -1       | 25  | 20  | $E$      | 3153.85597       | 3        |          | 28  | 7   | $A_1$    | 1592.35768       | 6        | 0        | 30  | 16    | $A_1$      | 2605.93837       | 11       | -3       |   |   |
| 21  | 6   | $E$      | 1378.56335       | 6        | 3        | 23  | 11  | $A_2$    | 1868.07796       | 6        | -1       | 26  | 0   | $E$      | 1327.89203       | 1        | 1        | 28  | 7   | $A_2$    | 1592.35768       | 6        | 0        | 30  | 16    | $A_2$      | 2605.93837       | 11       | -3       |   |   |
| 21  | 6   | $E$      | 1409.87048       | 7        | 2        | 23  | 12  | $E$      | 1917.89595       | 7        | -3       | 26  | 1   | $A_1$    | 1329.89908       | 5        | -1       | 28  | 7   | $E$      | 1628.78443       | 9        | 0        | 30  | 17    | $E$        | 2759.72252       | 6        | -5       |   |   |
| 21  | 7   | $A_1$    | 1438.08560       | 4        | -3       | 23  | 12  | $E$      | 1980.18443       | 6        | -2       | 26  | 1   | $A_2$    | 1330.23890       | 5        | -1       | 28  | 8   | $E$      | 1661.37615       | 5        | 3        | 30  | 18    | $E$        | 2922.78945       | 5        |          |   |   |
| 21  | 7   | $A_2$    | 1438.08560       | 4        | -3       | 23  | 13  | $A_1$    | 2034.29946       | 4        | -1       | 26  | 1   | $E$      | 1335.28631       | 6        | -3       | 28  | 8   | $A_1$    | 1702.97949       | 4        | 2        | 30  | 19    | $A_1$      | 3095.10424       | -5       |          |   |   |
| 21  | 7   | $E$      | 1474.59014       | 10       | 3        | 23  | 13  | $A_2$    | 2034.29946       | 4        | -1       | 26  | 2   | $E$      | 1341.81380       | 3        | -2       | 28  | 8   | $A_2$    | 1702.97949       | 4        | 2        | 30  | 19    | $A_2$      | 3095.10424       | -5       |          |   |   |
| 21  | 8   | $E$      | 1507.13390       | 3        | 2        | 23  | 13  | $E$      | 2101.70618       | 4        | 6        | 26  | 2   | $A_1$    | 1352.24643       | 4        | -2       | 28  | 9   | $E$      | 1739.90120       | 4        | -1       | 31  | 0     | $E$        | 1455.70541       | 8        | -1       |   |   |
| 21  | 8   | $A_1$    | 1548.82631       | 5        | 6        | 23  | 14  | $E$      | 2160.10924       | 4        | 0        | 26  | 2   | $A_2$    | 1352.24643       | 4        | -2       | 28  | 9   | $E$      | 1786.67021       | 6        | 0        | 31  | 1     | $A_2$      | 1458.12677       | 0        |          |   |   |
| 21  | 8   | $A_2$    | 1548.82631       | 5        | 6        | 23  | 14  | $A_1$    | 2232.61705       | 19       | 6        | 26  | 3   | $E$      | 1363.12100       | 2        | 0        | 28  | 10  | $A_1$    | 1827.91621       | -2       | 31       | 1   | $A_1$ | 1457.64726 | 11               | 2        |          |   |   |
| 21  | 9   | $E$      | 1585.69340       | 4        | 2        | 23  | 14  | $A_2$    | 2232.61705       | 19       | 6        | 26  | 3   | $E$      | 1378.76905       | 6        | -4       | 28  | 10  | $A_2$    | 1827.91621       | -2       | 31       | 1   | $E$   | 1463.09432 | 6                | 2        |          |   |   |
| 21  | 9   | $E$      | 1632.56293       | 3        | 6        | 23  | 15  | $E$      | 2295.29849       | 8        | -3       | 26  | 4   | $A_1$    | 1393.98987       | 3        | -2       | 28  | 10  | $E$      | 1879.83863       | 2        | 0        | 31  | 2     | $E$        | 1469.63252       | 10       | -1       |   |   |
| 21  | 10  | $A_1$    | 1673.74741       | 3        | 0        | 23  | 15  | $E$      | 2372.88918       | 9        | 2        | 26  | 4   | $A_2$    | 1393.98987       | 3        | -2       | 28  | 11  | $E$      | 1925.40245       | 5        | -2       | 31  | 2     | $A_1$      | 1480.04434       | 5        | 0        |   |   |
| 21  | 10  | $A_2$    | 1673.74741       | 3        | 0        | 23  | 16  | $A_1$    | 2439.83861       | 15       | 6        | 26  | 4   | $E$      | 1414.84858       | 7        | 2        | 28  | 11  | $A_1$    | 1982.46474       | 2        | 5        | 31  | 2     | $A_2$      | 1480.04434       | 5        | -9       |   |   |
| 21  | 10  | $E$      | 1725.78199       | 2        | 2        | 23  | 16  | $A_2$    | 2439.83861       | 15       | 6        | 26  | 5   | $E$      | 1434.41346       | 2        | -1       | 28  | 11  | $A_2$    | 1982.46474       | 2        | 5        | 31  | 3     | $E$        | 1490.93341       | 5        | 0        |   |   |
| 21  | 11  | $E$      | 1771.27723       | 2        | 2        | 23  | 17  | $E$      | 2593.69859       | 6        | -3       | 26  | 5   | $A_1$    | 1460.47703       | 5        | 0        | 28  | 12  | $E$      | 2032.33919       | 3        | 2        | 31  | 3     | $E$        | 1506.55281       | 4        | -1       |   |   |
| 21  | 11  | $A_1$    | 1828.46352       | 1        | -1       | 23  | 18  | $E$      | 2756.84607       | -2       |          | 26  | 5   | $A_2$    | 1460.47703       | 5        | 0        | 28  | 12  | $E$      | 2094.52644       | 4        | 8        | 31  | 4     | $A_1$      | 1521.79273       | 1        | -5       |   |   |
| 21  | 11  | $A_2$    | 1828.46352       | 1        | -1       | 23  | 19  | $A_1$    | 2929.24615       | -2       |          | 26  | 6   | $E$      | 1484.38306       | 5        | -3       | 28  | 13  | $A_1$    | 2148.70359       | 2        | 0        | 31  | 4     | $A_2$      | 1521.79273       | 1        | -5       |   |   |
| 21  | 12  | $E$      | 1878.26202       | 2        | 1        | 23  | 19  | $A_2$    | 2929.24628       | -2       |          | 26  | 6   | $E$      | 1515.64456       | 7        | -4       | 28  | 13  | $A_2$    | 2148.70359       | 2        | 0        | 31  | 4     | $E$        | 1542.61411       | 4        | -1       |   |   |
| 21  | 12  | $E$      | 1940.58554       | 2        | 1        | 23  | 20  | $E$      | 3110.86248       | 25       | 0        | 26  | 7   | $A_1$    | 1543.88812       | 17       | -1       | 28  | 13  | $E$      | 2215.99970       | 9        | 9        | 31  | 5     | $E$        | 1562.20311       | 4        | -2       |   |   |
| 21  | 13  | $A_1$    | 1994.67903       | 9        | -1       | 24  | 0   | $E$      | 1282.91255       | 2        | -2       | 26  | 7   | $A_2$    | 1543.88812       | 17       | -1       | 28  | 14  | $E$      | 2274.47096       | 1        | 0        | 31  | 5     | $A_1$      | 1588.22048       | 4        | 3        |   |   |
| 21  | 13  | $A_2$    | 1994.67903       | 9        | -1       | 24  | 1   | $A_1$    | 1284.94280       | 5        | 0        | 26  | 7   | $E$      | 1580.33937       | 9        | 2        | 28  | 15  | $E$      | 2409.61452       | 15       | -3       | 31  | 5     | $A_2$      | 1588.22048       | 4        | 3        |   |   |
| 21  | 13  | $E$      | 2062.12396       |          | 0        | 24  | 1   | $A_2$    | 1285.23338       | -1       |          | 26  | 8   | $E$      | 1612.91597       | 5        | 2        | 28  | 15  |          |                  |          |          |     |       |            |                  |          |          |   |   |

| $J$ | $K$ | $\Gamma$ | $E^{\text{exp}}$ | $\Delta$ | $\delta$ | $J$ | $K$ | $\Gamma$ | $E^{\text{exp}}$ | $\Delta$ | $\delta$ | $J$ | $K$ | $\Gamma$ | $E^{\text{exp}}$ | $\Delta$ | $\delta$ | $J$ | $K$ | $\Gamma$ | $E^{\text{exp}}$ | $\Delta$ | $\delta$ | $J$ | $K$ | $\Gamma$ | $E^{\text{exp}}$ | $\Delta$ | $\delta$ |
|-----|-----|----------|------------------|----------|----------|-----|-----|----------|------------------|----------|----------|-----|-----|----------|------------------|----------|----------|-----|-----|----------|------------------|----------|----------|-----|-----|----------|------------------|----------|----------|
| 1   | 2   | 3        | 4                |          |          | 1   | 2   | 3        | 4                |          |          | 1   | 2   | 3        | 4                |          |          | 1   | 2   | 3        | 4                |          |          | 1   | 2   | 3        | 4                |          |          |
| 32  | 19  | $A_1$    | 3150.35214       |          | 2        | 35  | 12  | $E$      | 2229.34207       | 8        | 2        | 38  | 11  | $E$      | 2220.02936       | 4        | 1        | 41  | 11  | $E$      | 2325.43522       | 19       | -7       | 44  | 11  | $A_1$    | 2495.31599       | 8        | 3        |
| 33  | 0   | $E$      | 1512.96776       | 6        | -1       | 35  | 12  | $E$      | 2291.35460       | 2        | -8       | 38  | 11  | $A_2$    | 2276.85363       | 7        | 3        | 41  | 11  | $A_1$    | 2382.17424       |          | 8        | 44  | 11  | $A_2$    | 2495.31599       | 8        | 3        |
| 33  | 1   | $A_2$    | 1515.42268       |          | -3       | 35  | 13  | $A_1$    | 2345.63918       | 8        | -5       | 38  | 11  | $A_1$    | 2276.85363       | 7        | 3        | 41  | 11  | $A_2$    | 2382.17424       |          | 8        | 44  | 12  | $E$      | 2545.44558       | 8        | 2        |
| 33  | 1   | $A_1$    | 1514.88060       | 8        | -3       | 35  | 13  | $A_2$    | 2345.63918       | 8        | -5       | 38  | 12  | $E$      | 2326.87408       | 14       | -6       | 41  | 12  | $E$      | 2432.24720       | 27       | -1       | 44  | 12  | $E$      | 2607.17668       |          | 0        |
| 33  | 1   | $E$      | 1520.35431       | 1        | -1       | 35  | 13  | $E$      | 2412.74436       | 7        | -4       | 38  | 12  | $E$      | 2388.79995       | 3        | -2       | 41  | 12  | $E$      | 2494.07922       | 5        | 0        | 44  | 13  | $A_1$    | 2661.63489       | 4        | 0        |
| 33  | 2   | $E$      | 1526.89770       | 4        | 0        | 35  | 14  | $E$      | 2471.33356       | 7        | -8       | 38  | 13  | $A_1$    | 2443.13807       | 2        | 3        | 41  | 13  | $A_1$    | 2548.47518       | 4        | 2        | 44  | 13  | $A_2$    | 2661.63489       | 4        | 0        |
| 33  | 3   | $E$      | 1548.19567       |          | 2        | 35  | 15  | $E$      | 2606.39858       |          | -1       | 38  | 13  | $A_2$    | 2443.13807       | 2        | 3        | 41  | 13  | $A_2$    | 2548.47518       | 4        | 2        | 44  | 14  | $E$      | 2787.21229       | 12       | 0        |
| 33  | 3   | $E$      | 1563.80207       | 10       | 2        | 35  | 16  | $A_2$    | 2750.80536       | 10       | -2       | 38  | 14  | $E$      | 2568.79630       | 6        | -4       | 41  | 14  | $E$      | 2674.09444       | 7        | -1       | 44  | 16  | $A_1$    | 3066.42266       |          | -6       |
| 33  | 4   | $A_2$    | 1579.05074       | 2        | 1        | 35  | 16  | $A_1$    | 2750.80536       | 10       | -2       | 38  | 15  | $E$      | 2703.82236       | 6        | -1       | 41  | 15  | $E$      | 2809.07845       | 10       | 2        | 44  | 16  | $A_2$    | 3066.42266       |          | -6       |
| 33  | 4   | $A_1$    | 1579.05074       | 2        | 1        | 35  | 17  | $E$      | 2904.52340       | 19       | 4        | 38  | 16  | $A_1$    | 2848.18750       | 11       | 6        | 41  | 16  | $A_2$    | 2953.39842       | 8        | -3       | 45  | 0   | $E$      | 1929.91854       | 4        | 0        |
| 33  | 4   | $E$      | 1599.85523       | 4        | 0        | 36  | 0   | $E$      | 1605.42501       | 11       | 9        | 38  | 16  | $A_2$    | 2848.18750       | 11       | 6        | 41  | 16  | $A_1$    | 2953.39842       | 8        | -3       | 45  | 1   | $A_2$    | 1932.62093       |          | 0        |
| 33  | 5   | $E$      | 1619.45511       | 5        | -3       | 36  | 1   | $A_1$    | 1607.29140       | 5        | 3        | 38  | 17  | $E$      | 3001.86091       | 19       | -2       | 41  | 17  | $E$      | 3107.02388       |          | 0        | 45  | 1   | $A_1$    | 1931.62553       | 2        | 0        |
| 33  | 5   | $A_1$    | 1645.45165       | 10       | 1        | 36  | 1   | $A_2$    | 1607.93418       |          | -1       | 39  | 0   | $E$      | 1705.74600       | 4        | 0        | 42  | 0   | $E$      | 1813.91596       | 7        | 0        | 45  | 1   | $E$      | 1937.29022       | 6        | 0        |
| 33  | 5   | $A_2$    | 1645.45165       | 10       | 1        | 36  | 1   | $E$      | 1612.80786       | 3        | 1        | 39  | 1   | $A_2$    | 1708.31459       |          | -1       | 42  | 1   | $A_1$    | 1815.67931       |          | -4       | 45  | 2   | $E$      | 1943.87732       | 4        | -3       |
| 33  | 6   | $E$      | 166              |          |          |     |     |          |                  |          |          |     |     |          |                  |          |          |     |     |          |                  |          |          |     |     |          |                  |          |          |

Continued

| $J$   | $K$            | $\Gamma$   | $E^{\text{exp}}$ | $\Delta$ | $\delta$ | $J$            | $K$        | $\Gamma$ | $E^{\text{exp}}$ | $\Delta$       | $\delta$       | $J$        | $K$ | $\Gamma$ | $E^{\text{exp}}$ | $\Delta$       | $\delta$       | $J$        | $K$  | $\Gamma$       | $E^{\text{exp}}$ | $\Delta$       | $\delta$   | $J$ | $K$  | $\Gamma$       | $E^{\text{exp}}$ | $\Delta$       | $\delta$   |    |      |                |                |                |            |    |     |    |
|-------|----------------|------------|------------------|----------|----------|----------------|------------|----------|------------------|----------------|----------------|------------|-----|----------|------------------|----------------|----------------|------------|------|----------------|------------------|----------------|------------|-----|------|----------------|------------------|----------------|------------|----|------|----------------|----------------|----------------|------------|----|-----|----|
| 1     | 2              | 3          | 4                | 1        | 2        | 3              | 4          | 1        | 2                | 3              | 4              | 1          | 2   | 3        | 4                | 1              | 2              | 3          | 4    | 1              | 2                | 3              | 4          | 1   | 2    | 3              | 4                | 1              | 2          | 3  | 4    |                |                |                |            |    |     |    |
| 47 10 | E              | 2513.86445 | 7                | 4        | 50 1     | A <sub>1</sub> | 2142.22037 | 2        | 52 7             | E              | 2482.52068     | 3          | -2  | 55 10    | A <sub>2</sub>   | 2823.33820     | 8              | -6         | 59 5 | A <sub>1</sub> | 2706.21114       |                |            | 5   | 59 5 | A <sub>2</sub> | 2706.21114       |                |            | 5  | 59 6 | E              | 2761.12506     |                |            | 5  |     |    |
| 47 11 | A <sub>1</sub> | 2616.26216 | 17               | 8        | 50 1     | A <sub>2</sub> | 2143.44369 | 0        | 52 8             | E              | 2515.38291     | 2          | 2   | 55 10    | E                | 2874.53048     |                |            | 18   | 59 5           | A <sub>2</sub>   | 2706.21114     |            |     | 5    | 59 6           | E                | 2761.12506     |            |    | 5    | 59 7           | A <sub>1</sub> | 2789.71366     |            |    | -2  |    |
| 47 11 | A <sub>2</sub> | 2616.26216 | 17               | 8        | 50 1     | E              | 2147.97957 | -4       | 52 8             | A <sub>1</sub> | 2556.48851     | 9          | -2  | 55 11    | A <sub>1</sub>   | 2976.79809     |                |            | 3    | 59 6           | E                | 2761.12506     |            |     | 5    | 59 7           | A <sub>2</sub>   | 2789.71366     |            |    | -5   | 59 8           | E              | 2858.50059     |            |    | 0   |    |
| 47 12 | E              | 2666.45230 | 7                | 1        | 50 2     | E              | 2154.59292 | 12       | -2               | 52 8           | A <sub>2</sub> | 2556.48851 | 9   | -2       | 55 11            | A <sub>2</sub> | 2976.79809     |            |      | 3              | 59 7             | A <sub>1</sub> | 2789.71366 |     |      | 5              | 59 8             | E              | 2858.50059 |    |      | -3             | 59 9           | E              | 2936.75857 |    |     | -4 |
| 47 12 | E              | 2728.07545 | 13               | 5        | 50 2     | A <sub>1</sub> | 2164.88008 | 0        | 52 9             | E              | 2639.92546     | 4          | 2   | 56 0     | E                | 2421.97874     | 5              | -10        | 59 7 | A <sub>2</sub> | 2789.71366       |                |            | -5  | 59 8 | A <sub>1</sub> | 2899.40400       |                |            | -3 | 60 1 | A <sub>1</sub> | 2628.15023     |                |            | 12 |     |    |
| 47 13 | A <sub>1</sub> | 2782.60038 | 6                | 2        | 50 2     | A <sub>2</sub> | 2164.87548 | 6        | 4                | 52 10          | A <sub>1</sub> | 2681.51664 | 0   | 56 1     | A <sub>1</sub>   | 2423.45403     | 5              | 2          | 59 8 | E              | 2858.50059       |                |            | 0   | 60 1 | A <sub>2</sub> | 2692.80152       |                |            | 4  | 3    | 60 2           | E              | 2640.80675     |            |    | 1   |    |
| 47 13 | A <sub>2</sub> | 2782.60038 | 6                | 2        | 50 3     | E              | 2175.85432 | 0        | 2                | 52 10          | A <sub>2</sub> | 2681.51664 | 0   | 56 1     | A <sub>2</sub>   | 2424.98060     |                |            | 5    | 59 8           | A <sub>2</sub>   | 2899.40400     |            |     | -3   | 60 2           | E                | 2640.80675     |            |    | 1    | 60 3           | E              | 2677.36765     | 6          |    | 5   |    |
| 47 14 | E              | 2908.13296 |                  | -2       | 50 3     | E              | 2191.31140 | 13       | 0                | 52 10          | E              | 2732.81341 | 1   | 4        | 56 1             | E              | 2429.33758     | 2          | 0    | 59 9           | E                | 2936.75857     |            |     | -4   | 60 3           | E                | 2677.36765     | 6          |    | 5    | 60 4           | A <sub>1</sub> | 2692.80152     |            |    | 4   |    |
| 47 16 | A <sub>1</sub> | 3187.24350 | 8                | 8        | 50 4     | A <sub>1</sub> | 2206.66083 | 1        | 0                | 53 0           | E              | 2277.41506 | 6   | -2       | 56 2             | A <sub>1</sub> | 2446.21897     | 7          | 4    | 60 1           | A <sub>1</sub>   | 2628.15023     |            |     | 12   | 60 4           | A <sub>2</sub>   | 2692.80152     |            |    | 4    | 3              | 60 5           | E              | 2733.08827 |    |     | -1 |
| 47 16 | A <sub>2</sub> | 3187.24350 | 8                | 8        | 50 4     | A <sub>2</sub> | 2206.66083 | 1        | 0                | 53 1           | A <sub>1</sub> | 2280.32809 |     |          | 3                | 56 2           | A <sub>2</sub> | 2446.21897 | 7    | 4              | 60 2             | E              | 2640.80675 |     |      | 1              | 60 5             | E              | 2733.08827 |    |      | -1             | 60 6           | E              | 2758.66905 |    |     | -1 |
| 48 0  | A              | 2053.73627 | 11               | -3       | 50 4     | A              | 2227.27600 | 8        | -2               | 53 1           | A <sub>2</sub> | 2278.95713 | 10  | 0        | 56 3             | E              | 2457.23245     |            |      | -3             | 60 3             | E              | 2677.36765 | 6   |      | 5              | 60 6             | E              | 2758.66905 |    |      | -1             | 60 7           | A <sub>1</sub> | 2715.37914 | 12 |     | -4 |
| 48 1  | A <sub>1</sub> | 2055.38382 | 3                | -2       | 50 5     | E              | 2246.99945 | 5        | 2                | 53 1           | E              | 2284.77713 | 5   | 2        | 56 3             | E              | 2472.61871     | 9          | -5   | 60 3           | E                | 2677.36765     | 6          |     | 5    | 60 7           | A <sub>2</sub>   | 2692.80152     |            |    | 4    | 3              | 60 8           | A <sub>1</sub> | 2951.82521 |    |     | 5  |
| 48 1  | A <sub>2</sub> | 2056.51327 |                  | -2       | 50 5     | A <sub>1</sub> | 2272.76415 | 8        | -4               | 53 2           | A <sub>1</sub> | 2291.40890 | 8   | 0        | 56 4             | A <sub>1</sub> | 2488.01641     | 5          | 0    | 60 4           | A <sub>1</sub>   | 2692.80152     |            |     | 4    | 3              | 60 8             | A <sub>2</sub> | 2951.82521 |    |      | 5              | 60 9           | E              | 2766.58762 |    |     | -7 |
| 48 1  | A              | 2061.10427 | 5                | 1        | 50 5     | A <sub>2</sub> | 2272.76415 | 8        | -4               | 53 2           | A <sub>2</sub> | 2301.66238 | 8   | 5        | 56 4             | A <sub>2</sub> | 2488.01641     | 5          | 0    | 60 4           | A <sub>2</sub>   | 2692.80152     |            |     | 4    | 3              | 60 9             | E              | 2766.58762 |    |      | -7             | 61 1           | A <sub>1</sub> | 2715.37914 | 12 |     | -4 |
| 48 2  | E              | 2067.70662 | 8                | 6        | 50 6     | E              | 2296.86029 | 6        | 1                | 53 2           | A <sub>1</sub> | 2301.66238 | 8   | 5        | 56 4             | E              | 2508.54395     |            |      | -4             | 60 5             | E              | 2733.08827 |     |      | -1             | 61 1             | A <sub>2</sub> | 2681.46735 | 10 |      | 2              | 61 2           | E              | 2694.15559 |    |     | 2  |
| 48 2  | A <sub>1</sub> | 2078.01076 | 18               | 5        | 50 7     | A <sub>1</sub> | 2356.23244 | 6        | -1               | 53 3           | E              | 2312.66125 | 5   | 2        | 56 5             | A <sub>1</sub> | 2553.98382     | 13         | -3   | 60 5           | E                | 2733.08827     |            |     | -1   | 61 2           | E                | 2694.15559     |            |    | 2    | 61 3           | E              | 2715.37914     | 12         |    | -4  |    |
| 48 2  | A <sub>2</sub> | 2078.01076 | 18               | 5        | 50 7     | A <sub>2</sub> | 2356.23244 | 6        | -1               | 53 3           | E              | 2312.66125 | 5   | 2        | 56 5             | A <sub>2</sub> | 2553.98382     | 13         | -3   | 60 5           | A <sub>2</sub>   | 2692.80152     |            |     | 4    | 3              | 61 3             | E              | 2715.37914 | 12 |      | -4             | 61 4           | A <sub>1</sub> | 2746.14189 |    |     | -3 |
| 48 3  | E              | 2088.97338 | 11               | 2        | 50 7     | E              | 2392.26996 | 17       | -6               | 53 4           | E              | 2328.08420 | 8   | 1        | 56 5             | E              | 2578.14803     | 10         | -3   | 60 6           | E                | 2758.66905     |            |     | -1   | 61 4           | A <sub>2</sub>   | 2746.14189     |            |    | -3   | 61 5           | E              | 2786.42299     |            |    | 0   |    |
| 48 3  | A              | 2104.45186 | 15               | 2        | 50 8     | E              | 2425.10326 |          |                  | 53 5           | E              | 2383.78100 | 11  | 8        | 56 6             | E              | 2608.92865     | 26         | -3   | 60 7           | A <sub>1</sub>   | 2715.37914     | 12         |     | -4   | 61 5           | E                | 2786.42299     |            |    | 0    | 61 6           | E              | 2836.21107     | 5          |    | 0   |    |
| 48 4  | A <sub>1</sub> | 2119.78674 | 8                | -2       | 50 8     | A <sub>1</sub> | 2466.26189 | 11       | 5                | 53 5           | A <sub>1</sub> | 2409.49430 | 12  | 0        | 56 7             | E              | 2673.36666     |            |      | 3              | 60 8             | A <sub>1</sub> | 2951.82521 |     |      | 5              | 61 6             | E              | 2836.21107 | 5  |      | 0              | 61 7           | A <sub>1</sub> | 2951.82521 |    |     | 5  |
| 48 4  | A <sub>2</sub> | 2119.78674 | 8                | -2       | 50 8     | A <sub>2</sub> | 2466.26189 | 11       | 5                | 53 5           | A <sub>2</sub> | 2409.49430 | 12  | 0        | 56 10            | A <sub>1</sub> | 2872.33334     | 21         | -6   | 60 8           | A <sub>2</sub>   | 2951.82521     |            |     | 5    | 61 7           | A <sub>2</sub>   | 2951.82521     |            |    | 5    | 61 8           | E              | 2895.49474     | 8          |    | -1  |    |
| 48 4  | E              | 2140.42866 | 21               | 0        | 50 9     | E              | 2503.45792 | 7        | 2                | 53 6           | E              | 2433.62334 | 6   | -2       | 56 10            | A <sub>2</sub> | 2872.33334     | 21         | -6   | 60 8           | E                | 2895.49474     | 8          |     | -1   | 61 8           | E                | 2895.49474     | 8          |    | -1   | 61 9           | E              | 2964.26104     |            |    | -11 |    |
| 48 5  | E              | 2160.13454 | 5                | 0        | 50 9     | E              | 2549.72558 | 5        | 1                | 53 6           | E              | 2464.46845 | 10  | -2       | 56 10            | E              | 2923.48942     |            |      | 14             | 61 8             | E              | 2895.49474 | 8   |      | -1             | 61 9             | E              | 2964.26104 |    |      | -11            | 62 0           | E              | 2734.30599 |    |     | 5  |
| 48 5  | A <sub>1</sub> | 2185.93181 |                  | 4        | 50 10    | A <sub>1</sub> | 2591.27993 | 3        | 2                | 53 7           | A <sub>1</sub> | 2492.97304 | 10  | -8       | 56 11            | A <sub>1</sub> | 3025.73948     |            |      | 20             | 62 0             | E              | 2734.30599 |     |      | 5              | 62 1             | A <sub>1</sub> | 2735.64011 |    |      | 5              | 62 2           | E              | 2737.50156 |    |     | 3  |
| 48 5  | A <sub>2</sub> | 2185.93181 |                  | 4        | 50 10    | A <sub>2</sub> | 2591.27993 | 3        | 2                | 53 7           | A <sub>2</sub> | 2492.97304 | 10  | -8       | 56 11            | A <sub>2</sub> | 3025.73948     |            |      | 20             | 62 1             | A <sub>2</sub> | 2737.50156 |     |      | 3              | 62 2             | E              | 2737.50156 |    |      | 3              | 62 3           | E              | 2741.65895 |    |     | -1 |
| 48 6  | E              | 2210.00705 | 13               | -2       | 50 10    | E              | 2642.64313 |          | -0               | 53 7           | E              | 2528.94028 | 18  | 0        | 57 0             | E              | 2471.88806     | 5          | -1   | 61 8           | E                | 2895.49474     | 8          |     | -1   | 62 3           | E                | 2741.65895     |            |    | -1   | 62 4           | E              | 2746.14189     |            |    | -3  |    |
| 48 6  | E              | 2240.95145 | 14               | 6        | 50 11    | A <sub>1</sub> | 2744.99438 | 6        | -4               | 53 8           | E              | 2561.81740 | 3   | -2       | 57 1             | A <sub>1</sub> | 2474.92060     | 9          | 4    | 61 4           | A <sub>1</sub>   | 2746.14189     |            |     | -3   | 62 4           | E                | 2746.14189     |            |    | -3   | 62 5           | E              | 2768.42299     |            |    | 0   |    |
| 48 7  | A <sub>1</sub> | 2269.39348 | 6                | 1        | 50 11    | A <sub>2</sub> | 2744.99438 | 6        | -4               | 53 8           | A <sub>1</sub> | 2602.89576 | 5   | -1       | 57 1             | A <sub>2</sub> | 2473.34032     |            |      | -7             | 61 4             | A <sub>2</sub> | 2746.14189 |     |      | -3             | 62 5             | E              | 2768.42299 |    |      | 0              | 61 6           | E              | 2836.21107 | 5  |     | 0  |
| 48 7  | A <sub>2</sub> | 2269.39348 | 6                | 1        | 50 12    | E              | 2795.24932 |          |                  | 53 8           | A <sub>2</sub> | 2602.89576 | 5   | -1       | 57 1             | E              | 2479.24580     | 7          | 3    | 61 5           | E                | 2786.42299     |            |     | 0    | 61 6           | E                | 2836.21107     | 5          |    | 0    | 61 7           | A <sub>1</sub> | 2951.82521     |            |    | 5   |    |
| 48 7  | E              | 2305.47561 | 14               | -3       | 50 13    | A <sub>1</sub> | 2911.35345 | 15       | -3               | 53 10          | A <sub>1</sub> | 2727.92912 | 3   | 57       | 2                | E              | 2485.90575     | 3          | 1    | 61 6           | E                | 2836.21107     | 5          |     | 0    | 61 7           | A <sub>2</sub>   | 2951.82521     |            |    | 5    | 61 8           | E              | 2895.49474     | 8          |    | -1  |    |
| 48 8  | E              | 2338.28110 | 10               | 7        | 50 13    | A <sub>2</sub> | 2911.35345 | 15       | -3               | 53 10          | A <sub>2</sub> | 2727.92912 | 3   | 57       | 2                | A <sub>2</sub> | 2496.12371     | 5          | -2   | 61 7           | A <sub>1</sub>   | 2951.82521     |            |     | 5    | 61 8           | E                | 2895.49474     | 8          |    | -1   | 61 9           | E              | 2964.26104     |            |    | -11 |    |
| 48 8  | A <sub>1</sub> | 2379.49048 | 9                | -6       | 50 14    | E              | 3036.83845 | 10       | -1               | 53 12          | E              | 2931.81736 | 23  | -2       | 57 3             | E              | 2507.14462     | 7          | 3    | 61 7           | A <sub>2</sub>   | 2951.82521     |            |     | 5    | 61 8           | E                | 2895.49474     | 8          |    | -1   | 61 9           | E              | 2964.26104     |            |    | -11 |    |
| 48 8  | A <sub>2</sub> | 2379.49048 | 9                | -6       | 51 0     | E              | 2185.35056 | 3        | -2               | 54 0           | E              | 2324.74149 | 27  | -3       | 57 3             | E              | 2522.51804     | 18         | -2   | 61 8           | E                | 2895.49474     | 8          |     | -1   | 62 0           | E                | 2734.30599     |            |    | 5    | 62 1           | A <sub>1</sub> | 2735.64011     |            |    | 5   |    |
| 48 9  | E              | 2416.65511 |                  | 2        | 51 1     | A <sub>1</sub> | 2188.20740 | 0        | 54               | 1              | A <sub>1</sub> | 2326.26160 | 9   | 3        | 57 4             | A <sub>1</sub> | 2537.92445     |            |      | 0              | 61 10            | A <sub>1</sub> | 3130.18157 | 15  |      | 15             | 62 1             | A <sub>2</sub> | 2737.50156 |    |      | 3              | 62 2           | E              | 2741.65895 |    |     | -1 |
| 48 9  | E              | 2462.98008 | 4                | 2        | 51 1     | A <sub>2</sub> | 2186.93576 | 5        | 1                | 54 1           | A <sub>1</sub> | 2327.68348 |     | 0        | 57 4             | A <sub>2</sub> | 2537.92445     |            |      | 15             | 62 2             | E              | 2741.65895 |     |      | -1             | 62 3             | E              | 2768.42299 |    |      | 0              | 62 4           | E              | 2768.42299 |    |     | 0  |
| 48 10 | A <sub>1</sub> | 2504.49905 | 7                | 2        | 51 1     | E              | 2192.71492 | 5        | -1               | 54 1           | E              | 2332.10245 | 18  | 1        | 57 4             | E              | 2558.43629     | 5          | -4   | 62 0           | E                | 2734.30599     |            |     | 5    | 62 1           | A <sub>1</sub>   | 2735.64011     |            |    | 5    | 62 2           | E              | 2737.50156     |            |    | 3   |    |
| 48 10 | A <sub>2</sub> | 2504.49905 | 7                | 2        | 51 2     | E              | 2199.33419 | 4        | 2                | 54 2           | E              | 2338.74088 | 14  | 0        | 57 5             | E              | 2578.22785     | 15         | 3    | 62 1           | A <sub>2</sub>   | 2737.50156     |            |     |      |                |                  |                |            |    |      |                |                |                |            |    |     |    |
